# Supplementary material for: Response of Benthic Fauna to Habitat Heterogeneity in a Shallow Temperate Lake
Source: MDPI journal article supplement (doi:10.3390/ani11092488), 2021-08-25
Supplement: s1 [file s1]

Table S1. Physicochemical properties and trophic state indices of water in different depth zones of two segments of Lake Wicko.

| Depth | Zone         | Segment | Month  | Year | SD   | Temp | pH   | DO%   | EC  | Sal   | NO3-  | NH4+  | PPO43- | TP    | Chl-a | Cl-   | Na+  | K+  | Ca2+ | Mg <sup>2+</sup> | TSISD | TSITP | TSIChl |
|-------|--------------|---------|--------|------|------|------|------|-------|-----|-------|-------|-------|--------|-------|-------|-------|------|-----|------|------------------|-------|-------|--------|
| 0.3   | eulitoral    | western | spring | 2014 | 0.20 | 14.6 | 8.21 | 53.6  | 222 | 0.099 | 0.754 | 0.366 | 0.035  | 0.799 | 89.7  | 55.3  | 15.4 | 1.3 | 14.4 | 2.5              | 83.2  | 100.5 | 74.7   |
| 0.3   | eulitoral    | western | summer | 2014 | 0.20 | 22.3 | 8.11 | 60.9  | 358 | 0.148 | 0.947 | 0.460 | 0.020  | 0.452 | 124.6 | 52.2  | 29.3 | 2.0 | 17.0 | 3.0              | 83.2  | 92.3  | 77.9   |
| 0.3   | eulitoral    | western | autumn | 2014 | 0.20 | 15.1 | 8.09 | 46.9  | 198 | 0.120 | 0.221 | 0.154 | 0.029  | 0.648 | 122.3 | 42.3  | 32.4 | 2.4 | 20.7 | 3.4              | 83.2  | 97.5  | 77.8   |
| 0.3   | eulitoral    | western | spring | 2015 | 0.20 | 13.2 | 7.81 | 60.3  | 235 | 0.187 | 0.871 | 0.372 | 0.035  | 0.783 | 120.4 | 62.3  | 12.0 | 1.7 | 15.7 | 3.1              | 83.2  | 100.2 | 77.6   |
| 0.3   | eulitoral    | western | summer | 2015 | 0.20 | 16.5 | 8.02 | 34.9  | 301 | 0.155 | 0.841 | 0.359 | 0.031  | 0.702 | 226.8 | 51.6  | 20.3 | 2.7 | 18.3 | 3.2              | 83.2  | 98.7  | 83.8   |
| 0.3   | eulitoral    | western | autumn | 2015 | 0.20 | 13.3 | 8.09 | 48.9  | 298 | 0.148 | 0.410 | 0.175 | 0.029  | 0.648 | 226.3 | 50.6  | 27.0 | 4.3 | 22.0 | 2.5              | 83.2  | 97.5  | 83.8   |
| 0.5   | infralitoral | western | spring | 2014 | 0.45 | 15.6 | 8.07 | 60.9  | 248 | 0.087 | 0.547 | 0.369 | 0.028  | 0.628 | 30.2  | 58.9  | 13.7 | 2.1 | 14.4 | 3.7              | 71.5  | 97.0  | 64.0   |
| 0.5   | infralitoral | western | summer | 2014 | 0.40 | 19.9 | 7.95 | 55.0  | 354 | 0.098 | 0.621 | 0.419 | 0.020  | 0.461 | 36.5  | 66.4  | 23.0 | 2.4 | 16.3 | 3.9              | 73.2  | 92.6  | 65.9   |
| 0.5   | infralitoral | western | autumn | 2014 | 0.40 | 8.9  | 8.03 | 36.9  | 333 | 0.122 | 0.231 | 0.156 | 0.019  | 0.422 | 34.7  | 82.6  | 29.7 | 3.1 | 20.3 | 4.6              | 73.2  | 91.3  | 65.4   |
| 0.5   | infralitoral | western | spring | 2015 | 0.35 | 11.9 | 8.36 | 75.3  | 215 | 0.098 | 0.999 | 0.862 | 0.030  | 0.673 | 37.0  | 66.4  | 15.7 | 1.4 | 13.0 | 2.2              | 75.1  | 98.0  | 66.0   |
| 0.5   | infralitoral | western | summer | 2015 | 0.40 | 19.8 | 8.21 | 77.6  | 259 | 0.105 | 0.874 | 0.754 | 0.027  | 0.619 | 40.4  | 71.1  | 29.5 | 2.0 | 18.3 | 2.7              | 73.2  | 96.8  | 66.9   |
| 0.5   | infralitoral | western | autumn | 2015 | 0.35 | 11.9 | 8.19 | 39.7  | 256 | 0.111 | 0.321 | 0.277 | 0.020  | 0.452 | 31.3  | 75.2  | 33.4 | 2.0 | 24.3 | 1.5              | 75.1  | 92.3  | 64.4   |
| 0.7   | infralitoral | western | spring | 2014 | 0.30 | 15.1 | 7.91 | 70.4  | 256 | 0.080 | 0.889 | 0.214 | 0.047  | 1.054 | 6.2   | 54.2  | 32.8 | 3.2 | 18.4 | 3.0              | 77.3  | 104.5 | 48.6   |
| 0.7   | infralitoral | western | summer | 2014 | 0.25 | 27.7 | 8.33 | 135.9 | 317 | 0.100 | 0.582 | 0.947 | 0.017  | 0.325 | 7.5   | 88.5  | 67.7 | 8.9 | 19.2 | 3.4              | 80.0  | 87.5  | 50.3   |
| 0.7   | infralitoral | western | autumn | 2014 | 0.30 | 14.0 | 8.43 | 107.1 | 322 | 0.100 | 0.258 | 0.214 | 0.025  | 0.108 | 7.4   | 114.2 | 70.8 | 5.6 | 34.5 | 9.3              | 77.3  | 71.6  | 50.2   |
| 0.7   | infralitoral | western | spring | 2015 | 0.25 | 15.5 | 8.73 | 113.6 | 209 | 0.070 | 1.296 | 0.229 | 0.020  | 0.846 | 7.1   | 53.3  | 28.8 | 6.4 | 25.5 | 6.3              | 80.0  | 101.3 | 49.9   |
| 0.7   | infralitoral | western | summer | 2015 | 0.25 | 15.5 | 8.68 | 92.0  | 456 | 0.222 | 0.999 | 0.032 | 0.016  | 0.762 | 5.4   | 61.3  | 40.4 | 4.4 | 17.2 | 3.1              | 80.0  | 99.8  | 47.1   |
| 0.7   | infralitoral | western | autumn | 2015 | 0.25 | 14.2 | 9.24 | 79.3  | 512 | 0.252 | 1.154 | 0.547 | 0.011  | 0.753 | 5.4   | 50.4  | 32.2 | 4.3 | 20.1 | 2.0              | 80.0  | 99.7  | 47.1   |
| 1     | sublitoral   | western | spring | 2014 | 0.43 | 14.3 | 8.59 | 106.3 | 209 | 0.068 | 0.588 | 0.323 | 0.016  | 0.079 | 103.3 | 52.8  | 30.6 | 3.0 | 28.4 | 0.0              | 72.3  | 67.1  | 76.1   |
| 1     | sublitoral   | western | summer | 2014 | 0.30 | 26.4 | 8.88 | 140.0 | 207 | 0.065 | 0.656 | 0.263 | 0.016  | 0.150 | 182.7 | 60.4  | 36.6 | 3.6 | 13.4 | 1.6              | 77.3  | 76.4  | 81.7   |
| 1     | sublitoral   | western | autumn | 2014 | 0.33 | 13.7 | 8.46 | 105.8 | 223 | 0.070 | 0.235 | 0.275 | 0.017  | 0.046 | 193.2 | 53.6  | 34.8 | 3.9 | 32.1 | 5.5              | 76.2  | 59.3  | 82.2   |
| 1     | sublitoral   | western | spring | 2015 | 0.28 | 14.8 | 8.81 | 115.0 | 209 | 0.065 | 0.814 | 0.187 | 0.024  | 0.680 | 171.5 | 50.0  | 28.0 | 4.9 | 20.7 | 5.4              | 78.6  | 98.2  | 81.1   |
| 1     | sublitoral   | western | summer | 2015 | 0.28 | 15.6 | 8.54 | 82.0  | 436 | 0.214 | 0.712 | 0.142 | 0.019  | 0.963 | 304.6 | 56.5  | 37.6 | 4.2 | 27.0 | 3.6              | 78.6  | 103.2 | 86.7   |
| 1     | sublitoral   | western | autumn | 2015 | 0.25 | 14.5 | 8.85 | 88.7  | 512 | 0.248 | 0.919 | 0.512 | 0.020  | 0.124 | 85.9  | 53.4  | 33.9 | 3.2 | 24.0 | 2.1              | 80.0  | 73.6  | 74.3   |
| 3     | sublitoral   | western | spring | 2014 | 0.40 | 14.2 | 8.75 | 116.2 | 205 | 0.070 | 1.579 | 0.345 | 0.020  | 0.066 | 95.4  | 54.2  | 33.8 | 3.3 | 18.7 | 0.0              | 73.2  | 64.6  | 75.3   |
| 3     | sublitoral   | western | summer | 2014 | 0.20 | 26.5 | 8.90 | 133.5 | 211 | 0.067 | 0.639 | 0.214 | 0.017  | 0.086 | 15.3  | 60.1  | 36.3 | 3.7 | 12.5 | 1.6              | 83.2  | 68.4  | 57.4   |
| 3     | sublitoral   | western | autumn | 2014 | 0.30 | 14.0 | 8.68 | 110.7 | 217 | 0.070 | 0.218 | 0.365 | 0.010  | 0.059 | 22.7  | 56.6  | 36.3 | 3.9 | 29.4 | 5.3              | 77.3  | 62.8  | 61.2   |
| 3     | sublitoral   | western | spring | 2015 | 0.35 | 13.9 | 8.80 | 115.0 | 210 | 0.070 | 6.220 | 0.175 | 0.023  | 0.744 | 39.9  | 50.2  | 27.8 | 6.3 | 20.1 | 5.5              | 75.1  | 99.5  | 66.8   |

|     |              |         |        |      |      |      |      |       |     |       |       |       |       |       |      |      |      |     |      |     |      |       |      |
|-----|--------------|---------|--------|------|------|------|------|-------|-----|-------|-------|-------|-------|-------|------|------|------|-----|------|-----|------|-------|------|
| 3   | sublitoral   | western | summer | 2015 | 0.30 | 15.7 | 8.66 | 83.1  | 429 | 0.210 | 1.687 | 0.114 | 0.017 | 0.889 | 21.5 | 56.9 | 37.3 | 4.1 | 17.7 | 2.9 | 77.3 | 102.1 | 60.7 |
| 3   | sublitoral   | western | autumn | 2015 | 0.25 | 14.2 | 8.77 | 87.1  | 514 | 0.261 | 0.749 | 0.541 | 0.022 | 0.044 | 22.1 | 54.2 | 35.1 | 4.2 | 18.1 | 0.2 | 80.0 | 58.6  | 60.9 |
| 0.3 | eulitoral    | eastern | spring | 2014 | 0.20 | 16.5 | 8.54 | 56.3  | 157 | 0.040 | 0.115 | 0.115 | 0.003 | 0.131 | 23.4 | 32.6 | 13.7 | 1.7 | 13.7 | 2.3 | 83.2 | 74.5  | 61.5 |
| 0.3 | eulitoral    | eastern | summer | 2014 | 0.20 | 28.3 | 8.60 | 48.6  | 201 | 0.058 | 0.166 | 0.087 | 0.029 | 0.721 | 21.4 | 38.3 | 15.4 | 2.0 | 15.7 | 2.7 | 83.2 | 99.0  | 60.6 |
| 0.3 | eulitoral    | eastern | autumn | 2014 | 0.20 | 15.3 | 7.98 | 60.3  | 209 | 0.120 | 0.344 | 0.102 | 0.017 | 0.621 | 20.0 | 37.8 | 19.7 | 2.3 | 18.7 | 3.0 | 83.2 | 96.9  | 60.0 |
| 0.3 | eulitoral    | eastern | spring | 2015 | 0.20 | 15.3 | 8.11 | 78.3  | 154 | 0.084 | 0.241 | 0.236 | 0.031 | 0.403 | 36.2 | 20.1 | 13.3 | 1.5 | 12.4 | 1.3 | 83.2 | 90.7  | 65.8 |
| 0.3 | eulitoral    | eastern | summer | 2015 | 0.20 | 21.3 | 8.03 | 60.3  | 189 | 0.088 | 0.253 | 0.287 | 0.024 | 0.532 | 32.9 | 21.1 | 17.0 | 2.1 | 15.7 | 1.7 | 83.2 | 94.7  | 64.9 |
| 0.3 | eulitoral    | eastern | autumn | 2015 | 0.20 | 14.3 | 8.24 | 66.3  | 199 | 0.099 | 0.284 | 0.154 | 0.029 | 0.611 | 29.3 | 23.7 | 21.0 | 2.1 | 19.0 | 2.3 | 83.2 | 96.7  | 63.7 |
| 0.5 | infralitoral | eastern | spring | 2014 | 0.45 | 14.9 | 8.36 | 80.2  | 166 | 0.125 | 0.359 | 0.169 | 0.020 | 0.222 | 40.2 | 30.0 | 11.1 | 1.5 | 11.9 | 0.9 | 71.5 | 82.1  | 66.8 |
| 0.5 | infralitoral | eastern | summer | 2014 | 0.40 | 25.3 | 7.98 | 54.9  | 189 | 0.154 | 0.442 | 0.222 | 0.023 | 0.479 | 39.0 | 36.9 | 15.6 | 2.3 | 17.0 | 1.3 | 73.2 | 93.1  | 66.5 |
| 0.5 | infralitoral | eastern | autumn | 2014 | 0.40 | 16.3 | 8.02 | 74.3  | 201 | 0.098 | 0.281 | 0.198 | 0.032 | 0.679 | 20.7 | 42.3 | 19.3 | 3.2 | 19.3 | 1.9 | 73.2 | 98.2  | 60.3 |
| 0.5 | infralitoral | eastern | spring | 2015 | 0.35 | 14.0 | 8.21 | 84.6  | 207 | 0.119 | 0.341 | 0.108 | 0.030 | 0.643 | 48.4 | 36.4 | 12.7 | 1.3 | 12.3 | 1.3 | 75.1 | 97.4  | 68.6 |
| 0.5 | infralitoral | eastern | summer | 2015 | 0.40 | 26.5 | 8.20 | 76.3  | 229 | 0.128 | 0.367 | 0.122 | 0.015 | 0.309 | 38.3 | 33.6 | 16.0 | 1.6 | 16.3 | 1.7 | 73.2 | 86.8  | 66.4 |
| 0.5 | infralitoral | eastern | autumn | 2015 | 0.30 | 14.5 | 8.09 | 83.3  | 309 | 0.058 | 0.166 | 0.098 | 0.020 | 0.432 | 43.0 | 42.1 | 18.3 | 2.1 | 19.0 | 2.7 | 77.3 | 91.7  | 67.5 |
| 0.7 | infralitoral | eastern | spring | 2014 | 0.50 | 13.5 | 8.64 | 109.6 | 188 | 0.060 | 0.775 | 0.147 | 0.001 | 0.150 | 5.5  | 43.6 | 27.3 | 3.1 | 19.3 | 1.3 | 70.0 | 76.4  | 47.3 |
| 0.7 | infralitoral | eastern | summer | 2014 | 0.35 | 25.7 | 8.74 | 129.8 | 202 | 0.067 | 0.562 | 0.101 | 0.014 | 0.051 | 5.4  | 55.3 | 32.8 | 3.3 | 15.2 | 1.3 | 75.1 | 61.0  | 47.1 |
| 0.7 | infralitoral | eastern | autumn | 2014 | 0.30 | 13.8 | 8.41 | 100.4 | 214 | 0.070 | 0.479 | 0.569 | 0.011 | 0.049 | 5.2  | 52.3 | 34.1 | 3.9 | 30.6 | 5.2 | 77.3 | 60.4  | 46.8 |
| 0.7 | infralitoral | eastern | spring | 2015 | 0.30 | 12.9 | 8.72 | 114.5 | 217 | 0.070 | 0.460 | 0.218 | 0.025 | 0.793 | 5.1  | 49.9 | 27.9 | 6.3 | 20.5 | 5.4 | 77.3 | 100.4 | 46.5 |
| 0.7 | infralitoral | eastern | summer | 2015 | 0.20 | 15.6 | 8.73 | 85.3  | 404 | 0.200 | 0.874 | 0.209 | 0.014 | 1.051 | 6.1  | 48.5 | 31.8 | 3.8 | 14.8 | 2.0 | 83.2 | 104.5 | 48.3 |
| 0.7 | infralitoral | eastern | autumn | 2015 | 0.25 | 14.5 | 8.34 | 81.2  | 511 | 0.250 | 1.610 | 1.002 | 0.020 | 0.436 | 6.2  | 52.1 | 33.5 | 4.0 | 41.9 | 3.3 | 80.0 | 91.8  | 48.5 |
| 1   | sublitoral   | eastern | spring | 2014 | 0.45 | 15.4 | 8.89 | 130.5 | 189 | 0.060 | 0.832 | 0.321 | 0.013 | 0.259 | 41.0 | 49.0 | 29.8 | 3.2 | 17.6 | 0.0 | 71.5 | 84.3  | 67.0 |
| 1   | sublitoral   | eastern | summer | 2014 | 0.32 | 28.2 | 8.94 | 137.2 | 199 | 0.060 | 0.607 | 0.210 | 0.012 | 0.190 | 46.2 | 54.6 | 32.8 | 3.4 | 11.4 | 1.1 | 76.4 | 79.8  | 68.2 |
| 1   | sublitoral   | eastern | autumn | 2014 | 0.30 | 13.8 | 8.01 | 80.3  | 218 | 0.070 | 0.200 | 0.145 | 0.037 | 0.470 | 74.3 | 52.6 | 33.5 | 3.6 | 31.3 | 5.1 | 77.3 | 92.9  | 72.9 |
| 1   | sublitoral   | eastern | spring | 2015 | 0.35 | 16.2 | 8.73 | 126.4 | 206 | 0.070 | 0.387 | 0.173 | 0.025 | 0.822 | 47.1 | 50.7 | 28.1 | 6.3 | 20.6 | 5.4 | 75.1 | 100.9 | 68.4 |
| 1   | sublitoral   | eastern | summer | 2015 | 0.25 | 16.0 | 8.59 | 95.4  | 398 | 0.190 | 1.000 | 0.074 | 0.019 | 0.906 | 14.2 | 48.1 | 31.6 | 3.6 | 17.6 | 2.2 | 80.0 | 102.3 | 56.7 |
| 1   | sublitoral   | eastern | autumn | 2015 | 0.25 | 14.7 | 8.68 | 86.7  | 511 | 0.250 | 1.579 | 0.604 | 0.018 | 0.722 | 35.8 | 51.5 | 34.1 | 4.4 | 55.0 | 4.7 | 80.0 | 99.1  | 65.7 |
| 3   | sublitoral   | eastern | spring | 2014 | 0.50 | 13.7 | 8.64 | 107.4 | 191 | 0.060 | 0.768 | 0.014 | 0.012 | 0.146 | 6.3  | 48.7 | 30.4 | 3.1 | 17.1 | 0.0 | 70.0 | 76.0  | 48.7 |
| 3   | sublitoral   | eastern | summer | 2014 | 0.35 | 25.1 | 8.65 | 122.5 | 200 | 0.060 | 0.620 | 0.320 | 0.017 | 0.235 | 5.7  | 53.9 | 32.4 | 3.2 | 16.7 | 1.2 | 75.1 | 82.9  | 47.7 |
| 3   | sublitoral   | eastern | autumn | 2014 | 0.35 | 14.1 | 8.44 | 102.3 | 216 | 0.070 | 0.226 | 0.514 | 0.018 | 0.242 | 5.8  | 51.8 | 33.5 | 3.6 | 31.7 | 5.4 | 75.1 | 83.3  | 47.9 |
| 3   | sublitoral   | eastern | spring | 2015 | 0.35 | 14.4 | 8.67 | 106.9 | 211 | 0.070 | 0.826 | 0.160 | 0.024 | 0.732 | 6.1  | 51.6 | 28.4 | 6.3 | 28.9 | 5.6 | 75.1 | 99.3  | 48.3 |
| 3   | sublitoral   | eastern | summer | 2015 | 0.25 | 16.3 | 8.60 | 76.1  | 406 | 0.200 | 1.444 | 0.304 | 0.014 | 0.792 | 6.0  | 49.8 | 32.6 | 3.8 | 18.6 | 2.6 | 80.0 | 100.4 | 48.2 |

|   |            |         |        |      |      |      |      |       |     |       |       |       |       |       |     |      |      |     |      |     |      |       |      |
|---|------------|---------|--------|------|------|------|------|-------|-----|-------|-------|-------|-------|-------|-----|------|------|-----|------|-----|------|-------|------|
| 3 | sublitoral | eastern | autumn | 2015 | 0.25 | 14.7 | 8.62 | 86.7  | 511 | 0.250 | 1.460 | 0.604 | 0.022 | 0.746 | 6.1 | 56.0 | 34.5 | 3.9 | 51.8 | 3.7 | 80.0 | 99.5  | 48.4 |
| 5 | sublitoral | eastern | spring | 2014 | 0.50 | 13.8 | 8.78 | 114.3 | 192 | 0.060 | 1.701 | 0.251 | 0.019 | 0.241 | 5.7 | 49.6 | 31.2 | 3.4 | 17.9 | 1.7 | 70.0 | 83.3  | 47.6 |
| 5 | sublitoral | eastern | summer | 2014 | 0.35 | 25.1 | 8.79 | 139.5 | 283 | 0.090 | 0.715 | 0.039 | 0.014 | 0.182 | 5.9 | 54.3 | 32.9 | 3.3 | 18.9 | 1.3 | 75.1 | 79.2  | 48.0 |
| 5 | sublitoral | eastern | autumn | 2014 | 0.30 | 13.5 | 8.02 | 78.9  | 212 | 0.070 | 0.225 | 0.367 | 0.020 | 0.253 | 6.1 | 51.3 | 33.8 | 3.8 | 29.8 | 5.0 | 77.3 | 83.9  | 48.3 |
| 5 | sublitoral | eastern | spring | 2015 | 0.35 | 14.2 | 8.56 | 111.3 | 207 | 0.070 | 1.379 | 0.208 | 0.021 | 0.788 | 6.3 | 53.2 | 29.5 | 6.4 | 24.0 | 6.2 | 75.1 | 100.3 | 48.7 |
| 5 | sublitoral | eastern | summer | 2015 | 0.30 | 16.1 | 8.53 | 80.4  | 406 | 0.200 | 0.874 | 0.095 | 0.019 | 0.911 | 6.1 | 49.3 | 32.3 | 3.7 | 17.0 | 2.4 | 77.3 | 102.4 | 48.4 |
| 5 | sublitoral | eastern | autumn | 2015 | 0.30 | 14.0 | 9.45 | 79.3  | 512 | 0.250 | 2.643 | 0.995 | 0.033 | 0.452 | 6.3 | 52.7 | 35.5 | 4.1 | 49.2 | 4.4 | 77.3 | 92.3  | 48.6 |

Table S2. Biological data of the invertebrate community in different depth zones of two segments of Lake Wicco.

| Depth | Zone         | Segment | Month  | Year | Oligochaeta | <i>Erbobdella octoculata</i> | <i>Glossiphonia complanata</i> | <i>Helobdella stagnalis</i> | <i>Asellus aquaticus</i> | <i>Sialis lutaria</i> | <i>Ecnomus tenellus</i> | <i>Phryganea grandis</i> | <i>Limnephilus politus</i> | <i>Ptychoptera</i> sp. | <i>Chironomidae</i> n.det. | <i>Einfeldia carbonaria</i> | <i>Tanytarsus gregarius</i> | <i>Chironomus</i> sp. | <i>Cryptochironomus conjugens</i> | <i>Bezzia</i> sp. | <i>Polypedium nubeculosus</i> | <i>Polypedium scalaeum</i> | <i>Cladotanytarsus mancus</i> | <i>Valvata piscinalis</i> | <i>Planorbarius corneus</i> | <i>Planorbis planorbis</i> | <i>Theodoxus fluviatilis</i> | <i>Sphaerium corneum</i> | <i>Unio pictorum</i> |
|-------|--------------|---------|--------|------|-------------|------------------------------|--------------------------------|-----------------------------|--------------------------|-----------------------|-------------------------|--------------------------|----------------------------|------------------------|----------------------------|-----------------------------|-----------------------------|-----------------------|-----------------------------------|-------------------|-------------------------------|----------------------------|-------------------------------|---------------------------|-----------------------------|----------------------------|------------------------------|--------------------------|----------------------|
| 0.3   | eulitoral    | western | spring | 2014 | 0.0         | 0.0                          | 0.0                            | 0.0                         | 0.0                      | 0.0                   | 2.6                     | 0.0                      | 0.5                        | 2.9                    | 4.7                        | 0.0                         | 0.0                         | 0.0                   | 0.0                               | 0.0               | 0.0                           | 0.0                        | 0.0                           | 0.0                       | 0.0                         | 0.0                        | 0.0                          | 0.0                      | 1.9                  |
| 0.3   | eulitoral    | western | summer | 2014 | 0.0         | 0.0                          | 0.0                            | 0.0                         | 0.0                      | 0.0                   | 0.0                     | 0.0                      | 2.9                        | 93.4                   | 152.3                      | 2.3                         | 0.0                         | 0.0                   | 0.0                               | 0.0               | 0.0                           | 0.0                        | 0.0                           | 0.0                       | 0.0                         | 2.2                        | 1.2                          | 0.0                      | 0.0                  |
| 0.3   | eulitoral    | western | autumn | 2014 | 11.2        | 5.6                          | 0.0                            | 0.0                         | 12.6                     | 0.0                   | 0.0                     | 0.0                      | 35.3                       | 0.0                    | 156.3                      | 0.0                         | 0.0                         | 0.0                   | 0.0                               | 1.2               | 0.0                           | 0.0                        | 0.0                           | 0.0                       | 0.0                         | 0.0                        | 0.0                          | 0.0                      | 0.0                  |
| 0.3   | eulitoral    | western | spring | 2015 | 25.6        | 0.0                          | 0.0                            | 0.0                         | 15.6                     | 0.0                   | 0.0                     | 0.0                      | 0.0                        | 28.6                   | 112.9                      | 0.0                         | 0.0                         | 0.0                   | 0.0                               | 0.0               | 0.0                           | 0.0                        | 0.0                           | 0.0                       | 0.0                         | 0.0                        | 0.0                          | 0.0                      | 15.6                 |
| 0.3   | eulitoral    | western | summer | 2015 | 0.0         | 0.0                          | 0.0                            | 0.0                         | 0.0                      | 0.0                   | 24.6                    | 0.0                      | 0.8                        | 0.0                    | 322.0                      | 0.0                         | 0.0                         | 0.0                   | 0.0                               | 0.0               | 0.0                           | 0.0                        | 0.0                           | 0.0                       | 0.0                         | 0.0                        | 0.0                          | 9.6                      | 2.3                  |
| 0.3   | eulitoral    | western | autumn | 2015 | 14.6        | 0.0                          | 0.0                            | 0.0                         | 0.0                      | 0.0                   | 50.3                    | 0.0                      | 0.0                        | 35.6                   | 89.3                       | 0.0                         | 0.0                         | 0.0                   | 0.0                               | 2.2               | 0.0                           | 0.0                        | 0.0                           | 0.0                       | 10.3                        | 0.0                        | 0.0                          | 0.0                      | 0.0                  |
| 0.5   | infralitoral | western | spring | 2014 | 0.0         | 1.2                          | 0.0                            | 0.0                         | 0.0                      | 0.0                   | 0.0                     | 0.0                      | 0.0                        | 0.0                    | 54.9                       | 0.0                         | 0.0                         | 0.0                   | 0.0                               | 52.1              | 0.0                           | 0.0                        | 0.0                           | 0.0                       | 0.0                         | 0.0                        | 0.0                          | 0.0                      | 0.0                  |
| 0.5   | infralitoral | western | summer | 2014 | 25.3        | 0.0                          | 0.0                            | 0.0                         | 0.0                      | 0.0                   | 2.6                     | 0.0                      | 0.0                        | 0.0                    | 84.3                       | 0.0                         | 0.0                         | 36.1                  | 0.0                               | 0.0               | 0.0                           | 0.0                        | 0.0                           | 1.3                       | 3.1                         | 0.0                        | 0.0                          | 0.0                      | 0.0                  |
| 0.5   | infralitoral | western | autumn | 2014 | 0.0         | 0.0                          | 11.3                           | 0.0                         | 0.0                      | 0.0                   | 2.9                     | 0.0                      | 5.9                        | 0.0                    | 0.0                        | 0.0                         | 0.0                         | 174.3                 | 0.0                               | 0.0               | 0.0                           | 0.0                        | 0.0                           | 0.0                       | 0.0                         | 0.0                        | 0.0                          | 0.0                      | 2.3                  |
| 0.5   | infralitoral | western | spring | 2015 | 11.3        | 0.0                          | 0.0                            | 0.0                         | 23.6                     | 0.0                   | 0.0                     | 0.0                      | 11.3                       | 35.6                   | 54.4                       | 0.0                         | 0.0                         | 0.0                   | 0.0                               | 0.0               | 2.3                           | 0.0                        | 0.0                           | 3.6                       | 0.0                         | 0.0                        | 0.0                          | 0.0                      | 2.3                  |
| 0.5   | infralitoral | western | summer | 2015 | 0.0         | 0.0                          | 0.0                            | 0.0                         | 0.0                      | 1.3                   | 0.0                     | 0.0                      | 0.0                        | 36.0                   | 87.9                       | 0.0                         | 0.0                         | 0.0                   | 26.3                              | 22.3              | 0.0                           | 0.0                        | 3.3                           | 0.0                       | 0.0                         | 0.0                        | 0.0                          | 0.0                      | 5.9                  |
| 0.5   | infralitoral | western | autumn | 2015 | 44.6        | 0.0                          | 0.0                            | 0.0                         | 0.0                      | 0.0                   | 0.0                     | 11.3                     | 0.0                        | 0.0                    | 108.9                      | 0.0                         | 0.0                         | 0.0                   | 0.0                               | 0.0               | 0.0                           | 0.0                        | 0.0                           | 6.9                       | 0.0                         | 0.0                        | 0.0                          | 0.0                      | 5.6                  |
| 0.7   | infralitoral | western | spring | 2014 | 2.3         | 0.0                          | 0.0                            | 0.0                         | 0.0                      | 0.0                   | 2.3                     | 0.0                      | 0.0                        | 0.0                    | 14.1                       | 0.0                         | 0.0                         | 0.0                   | 0.0                               | 0.0               | 0.0                           | 0.0                        | 0.0                           | 0.0                       | 0.0                         | 2.3                        | 0.0                          | 0.0                      | 0.0                  |
| 0.7   | infralitoral | western | summer | 2014 | 15.8        | 0.0                          | 0.0                            | 0.0                         | 0.0                      | 0.0                   | 0.0                     | 0.0                      | 2.3                        | 2.3                    | 32.3                       | 0.0                         | 0.0                         | 0.0                   | 0.0                               | 0.0               | 0.0                           | 0.0                        | 0.0                           | 0.0                       | 0.0                         | 0.0                        | 3.6                          | 0.0                      | 0.0                  |
| 0.7   | infralitoral | western | autumn | 2014 | 5.9         | 1.3                          | 0.0                            | 1.0                         | 0.0                      | 0.0                   | 0.0                     | 0.0                      | 0.0                        | 0.0                    | 56.3                       | 0.0                         | 0.0                         | 0.0                   | 15.9                              | 0.0               | 0.0                           | 0.0                        | 0.0                           | 0.0                       | 0.0                         | 0.0                        | 0.0                          | 0.0                      | 8.5                  |
| 0.7   | infralitoral | western | spring | 2015 | 12.3        | 0.0                          | 0.0                            | 0.0                         | 12.3                     | 5.6                   | 0.0                     | 0.0                      | 0.0                        | 1.3                    | 89.3                       | 0.0                         | 0.0                         | 0.0                   | 0.0                               | 0.0               | 0.0                           | 0.0                        | 0.0                           | 0.0                       | 0.0                         | 0.0                        | 0.0                          | 0.0                      | 4.5                  |
| 0.7   | infralitoral | western | summer | 2015 | 1.4         | 0.0                          | 0.0                            | 0.0                         | 0.0                      | 0.0                   | 0.0                     | 0.3                      | 0.0                        | 5.9                    | 91.7                       | 0.0                         | 0.0                         | 0.0                   | 0.0                               | 0.0               | 0.0                           | 0.0                        | 0.0                           | 0.0                       | 0.0                         | 0.0                        | 0.0                          | 0.0                      | 0.0                  |
| 0.7   | infralitoral | western | autumn | 2015 | 12.3        | 0.0                          | 0.0                            | 0.0                         | 0.0                      | 0.0                   | 0.0                     | 12.0                     | 5.3                        | 0.0                    | 69.2                       | 0.0                         | 0.0                         | 3.5                   | 0.0                               | 0.0               | 0.0                           | 0.0                        | 0.0                           | 0.0                       | 0.0                         | 0.0                        | 0.0                          | 0.0                      | 0.0                  |
| 1     | sublitoral   | western | spring | 2014 | 214.9       | 0.0                          | 0.0                            | 0.0                         | 0.0                      | 0.0                   | 0.0                     | 0.0                      | 0.0                        | 29.7                   | 0.0                        | 0.0                         | 29.7                        | 22.2                  | 0.0                               | 0.0               | 0.0                           | 0.0                        | 0.0                           | 0.0                       | 0.0                         | 0.0                        | 0.0                          | 0.0                      | 0.0                  |

|     |              |         |        |      |       |     |     |      |      |      |      |      |      |       |       |      |      |       |       |      |     |     |      |      |     |     |       |      |
|-----|--------------|---------|--------|------|-------|-----|-----|------|------|------|------|------|------|-------|-------|------|------|-------|-------|------|-----|-----|------|------|-----|-----|-------|------|
| 1   | sublitoral   | western | summer | 2014 | 44.4  | 0.0 | 0.0 | 0.0  | 0.0  | 0.0  | 0.0  | 0.0  | 0.0  | 96.3  | 0.0   | 0.0  | 14.8 | 0.0   | 0.0   | 0.0  | 0.0 | 0.0 | 0.0  | 7.4  | 0.0 | 0.0 | 0.0   | 0.0  |
| 1   | sublitoral   | western | autumn | 2014 | 14.8  | 0.0 | 0.0 | 0.0  | 0.0  | 0.0  | 0.0  | 0.0  | 0.0  | 103.7 | 0.0   | 0.0  | 7.4  | 214.8 | 0.0   | 0.0  | 0.0 | 0.0 | 0.0  | 0.0  | 0.0 | 0.0 | 0.0   | 29.7 |
| 1   | sublitoral   | western | spring | 2015 | 7.4   | 0.0 | 0.0 | 0.0  | 0.0  | 0.0  | 0.0  | 0.0  | 0.0  | 81.5  | 0.0   | 0.0  | 0.0  | 0.0   | 0.0   | 0.0  | 0.0 | 0.0 | 0.0  | 0.0  | 0.0 | 0.0 | 0.0   | 0.0  |
| 1   | sublitoral   | western | summer | 2015 | 111.1 | 0.0 | 0.0 | 0.0  | 0.0  | 0.0  | 0.0  | 0.0  | 0.0  | 133.4 | 0.0   | 0.0  | 0.0  | 118.5 | 7.4   | 0.0  | 0.0 | 0.0 | 0.0  | 0.0  | 0.0 | 0.0 | 0.0   | 0.0  |
| 1   | sublitoral   | western | autumn | 2015 | 22.2  | 0.0 | 0.0 | 0.0  | 0.0  | 0.0  | 0.0  | 0.0  | 0.0  | 0.0   | 0.0   | 0.0  | 14.8 | 355.6 | 0.0   | 0.0  | 0.0 | 0.0 | 0.0  | 0.0  | 0.0 | 0.0 | 0.0   | 0.0  |
| 3   | sublitoral   | western | spring | 2014 | 74.1  | 0.0 | 0.0 | 0.0  | 0.0  | 0.0  | 0.0  | 0.0  | 0.0  | 88.9  | 0.0   | 0.0  | 0.0  | 0.0   | 0.0   | 0.0  | 0.0 | 0.0 | 0.0  | 0.0  | 0.0 | 0.0 | 0.0   | 0.0  |
| 3   | sublitoral   | western | summer | 2014 | 0.0   | 0.0 | 0.0 | 0.0  | 0.0  | 0.0  | 0.0  | 0.0  | 0.0  | 74.1  | 0.0   | 0.0  | 14.8 | 0.0   | 0.0   | 0.0  | 0.0 | 0.0 | 0.0  | 0.0  | 0.0 | 0.0 | 0.0   | 0.0  |
| 3   | sublitoral   | western | autumn | 2014 | 14.8  | 0.0 | 0.0 | 0.0  | 0.0  | 0.0  | 0.0  | 0.0  | 0.0  | 0.0   | 0.0   | 0.0  | 0.0  | 847.4 | 281.5 | 0.0  | 0.0 | 0.0 | 0.0  | 0.0  | 0.0 | 0.0 | 0.0   | 0.0  |
| 3   | sublitoral   | western | spring | 2015 | 0.0   | 0.0 | 0.0 | 0.0  | 0.0  | 0.0  | 0.0  | 0.0  | 0.0  | 0.0   | 0.0   | 0.0  | 0.0  | 0.0   | 0.0   | 0.0  | 0.0 | 0.0 | 0.0  | 0.0  | 0.0 | 0.0 | 0.0   | 0.0  |
| 3   | sublitoral   | western | summer | 2015 | 29.6  | 0.0 | 0.0 | 0.0  | 0.0  | 0.0  | 0.0  | 0.0  | 0.0  | 74.1  | 44.4  | 0.0  | 0.0  | 296.3 | 0.0   | 0.0  | 0.0 | 0.0 | 0.0  | 0.0  | 0.0 | 0.0 | 0.0   | 0.0  |
| 3   | sublitoral   | western | autumn | 2015 | 0.0   | 0.0 | 0.0 | 0.0  | 0.0  | 0.0  | 0.0  | 0.0  | 0.0  | 163.0 | 0.0   | 0.0  | 0.0  | 340.7 | 0.0   | 0.0  | 0.0 | 0.0 | 0.0  | 0.0  | 0.0 | 0.0 | 148.1 | 0.0  |
| 0.3 | eulitoral    | eastern | spring | 2014 | 20.3  | 0.0 | 3.6 | 0.0  | 13.3 | 0.2  | 2.3  | 0.0  | 1.3  | 2.3   | 43.6  | 5.3  | 0.0  | 0.0   | 12.3  | 0.0  | 0.0 | 0.0 | 0.0  | 0.0  | 0.0 | 0.0 | 1.2   | 0.0  |
| 0.3 | eulitoral    | eastern | summer | 2014 | 0.0   | 1.3 | 1.5 | 0.0  | 15.3 | 0.6  | 1.7  | 0.0  | 5.6  | 1.3   | 91.5  | 0.0  | 0.0  | 0.0   | 0.0   | 0.0  | 0.0 | 0.0 | 0.0  | 0.0  | 0.0 | 1.3 | 2.2   | 0.0  |
| 0.3 | eulitoral    | eastern | autumn | 2014 | 12.3  | 0.0 | 3.6 | 0.0  | 20.3 | 0.0  | 5.6  | 0.0  | 12.3 | 12.5  | 14.9  | 14.8 | 0.0  | 0.0   | 0.0   | 0.0  | 2.3 | 0.0 | 0.0  | 10.0 | 0.0 | 0.0 | 0.0   | 0.0  |
| 0.3 | eulitoral    | eastern | spring | 2015 | 14.3  | 0.0 | 6.9 | 0.0  | 21.0 | 11.0 | 2.3  | 0.0  | 10.3 | 22.2  | 62.4  | 0.0  | 0.0  | 0.0   | 12.3  | 19.3 | 0.0 | 0.0 | 0.0  | 0.0  | 0.0 | 0.0 | 0.0   | 5.3  |
| 0.3 | eulitoral    | eastern | summer | 2015 | 20    | 3.5 | 0   | 14.6 | 0    | 0    | 0    | 0    | 6.4  | 67.2  | 88.9  | 0.0  | 0.0  | 0.0   | 0.5   | 0.0  | 0.0 | 0.0 | 0.0  | 12.7 | 0.0 | 5.7 | 0.0   | 1.5  |
| 0.3 | eulitoral    | eastern | autumn | 2015 | 12.6  | 0.0 | 0.0 | 0.0  | 45.3 | 0.0  | 0.0  | 0.0  | 11.9 | 12.9  | 0.0   | 0.0  | 0.0  | 0.0   | 45.2  | 0.0  | 0.0 | 0.0 | 0.0  | 15.6 | 6.8 | 0.0 | 12.4  | 2.6  |
| 0.5 | infralitoral | eastern | spring | 2014 | 0.0   | 2.3 | 0.0 | 0.0  | 22.9 | 12.7 | 0.0  | 8.6  | 3.4  | 0.0   | 0.0   | 19.7 | 0.0  | 0.0   | 0.0   | 0.0  | 0.0 | 0.0 | 2.1  | 11.3 | 2.3 | 0.0 | 0.3   | 1.6  |
| 0.5 | infralitoral | eastern | summer | 2014 | 3.9   | 0.8 | 1.9 | 3.1  | 27.0 | 1.3  | 0.0  | 2.1  | 3.3  | 99.3  | 0.0   | 0.0  | 0.0  | 91.5  | 0.0   | 0.0  | 0.0 | 0.0 | 0.0  | 1.1  | 0.0 | 0.0 | 0.0   | 0.0  |
| 0.5 | infralitoral | eastern | autumn | 2014 | 0.0   | 0.0 | 0.0 | 0.0  | 22.3 | 0.0  | 22.3 | 22.0 | 21.7 | 0.0   | 348.2 | 0.0  | 0.0  | 0.0   | 0.0   | 0.0  | 0.0 | 0.0 | 0.0  | 5.6  | 7.9 | 0.0 | 0.0   | 2.3  |
| 0.5 | infralitoral | eastern | spring | 2015 | 0.0   | 0.0 | 0.0 | 0.0  | 62.3 | 0.0  | 4.3  | 0.0  | 11.8 | 0.0   | 222.7 | 0.0  | 0.0  | 0.0   | 0.0   | 0.0  | 0.0 | 0.0 | 0.0  | 0.0  | 0.0 | 8.9 | 12.3  | 4.6  |
| 0.5 | infralitoral | eastern | summer | 2015 | 0     | 0   | 0   | 0    | 12.9 | 4.3  | 3    | 0    | 2.6  | 0.0   | 198.3 | 0.0  | 0.0  | 0.0   | 0.0   | 0.0  | 0.0 | 0.0 | 0.0  | 0.0  | 0.0 | 3.0 | 2.2   | 0.0  |
| 0.5 | infralitoral | eastern | autumn | 2015 | 3.3   | 2.3 | 0.0 | 0.0  | 26.3 | 0.0  | 12.3 | 0.0  | 2.9  | 0.0   | 478.3 | 0.0  | 0.5  | 0.0   | 0.0   | 0.0  | 0.0 | 0.0 | 10.0 | 0.0  | 0.0 | 5.4 | 0.0   | 0.0  |
| 0.7 | infralitoral | eastern | spring | 2014 | 2.2   | 0.5 | 2.3 | 2.3  | 25.6 | 0.0  | 6.5  | 0.0  | 5.8  | 0.4   | 55.1  | 0.0  | 0.0  | 0.0   | 0.0   | 0.0  | 0.0 | 0.0 | 0.0  | 0.0  | 0.0 | 0.0 | 4.6   | 0.0  |
| 0.7 | infralitoral | eastern | summer | 2014 | 4.3   | 0.0 | 0.5 | 0.0  | 0.3  | 0.0  | 24.6 | 1.4  | 1.6  | 2.6   | 320.2 | 0.0  | 0.0  | 14.4  | 0.0   | 0.0  | 0.0 | 0.0 | 0.0  | 0.0  | 0.0 | 0.0 | 0.0   | 0.0  |
| 0.7 | infralitoral | eastern | autumn | 2014 | 2.7   | 1.5 | 2.9 | 0.0  | 35.3 | 0.0  | 5.6  | 0.0  | 0.0  | 112.8 | 0.0   | 0.0  | 0.0  | 212.9 | 0.0   | 0.0  | 0.0 | 0.0 | 0.0  | 25.6 | 0.0 | 0.0 | 0.0   | 0.0  |

|     |              |         |        |      |        |      |     |     |      |     |      |     |     |       |       |      |       |       |      |       |       |      |     |     |      |     |     |      |       |      |
|-----|--------------|---------|--------|------|--------|------|-----|-----|------|-----|------|-----|-----|-------|-------|------|-------|-------|------|-------|-------|------|-----|-----|------|-----|-----|------|-------|------|
| 0.7 | infralitoral | eastern | spring | 2015 | 12.6   | 2.3  | 1.3 | 0.0 | 27.7 | 0.0 | 54.9 | 0.0 | 9.2 | 136.5 | 248.9 | 0.0  | 0.0   | 189.3 | 0.0  | 0.0   | 0.0   | 0.0  | 0.0 | 0.0 | 0.0  | 0.0 | 0.0 | 4.6  | 0.0   |      |
| 0.7 | infralitoral | eastern | summer | 2015 | 9.9    | 0.0  | 0.6 | 0.0 | 36.1 | 2.5 | 0.0  | 0.0 | 0.2 | 65.3  | 120.0 | 0.0  | 0.0   | 267.3 | 31.0 | 0.0   | 0.0   | 0.0  | 0.0 | 0.0 | 0.0  | 0.0 | 0.0 | 0.0  | 0.0   | 0.0  |
| 0.7 | infralitoral | eastern | autumn | 2015 | 89.3   | 12.3 | 0.0 | 0.0 | 0.0  | 0.0 | 0.0  | 0.0 | 0.0 | 0.0   | 0.0   | 0.0  | 0.0   | 727.3 | 0.0  | 0.0   | 0.0   | 0.0  | 0.0 | 0.0 | 0.0  | 0.0 | 0.0 | 12.4 | 0.0   |      |
| 1   | sublitoral   | eastern | spring | 2014 | 1525.9 | 0.0  | 0.0 | 0.0 | 0.0  | 0.0 | 0.0  | 0.0 | 0.0 | 237.0 | 0.0   | 0.0  | 0.0   | 0.0   | 0.0  | 14.8  | 0.0   | 0.0  | 0.0 | 0.0 | 0.0  | 0.0 | 0.0 | 0.0  | 0.0   | 0.0  |
| 1   | sublitoral   | eastern | summer | 2014 | 948.1  | 0.0  | 0.0 | 0.0 | 0.0  | 0.0 | 0.0  | 0.0 | 0.0 | 651.9 | 0.0   | 0.0  | 118.5 | 0.0   | 0.0  | 29.6  | 0.0   | 0.0  | 0.0 | 0.0 | 0.0  | 0.0 | 0.0 | 0.0  | 0.0   | 0.0  |
| 1   | sublitoral   | eastern | autumn | 2014 | 0.0    | 0.0  | 0.0 | 0.0 | 0.0  | 0.0 | 0.0  | 0.0 | 0.0 | 0.0   | 0.0   | 0.0  | 0.0   | 59.3  | 0.0  | 74.1  | 0.0   | 0.0  | 0.0 | 0.0 | 0.0  | 0.0 | 0.0 | 0.0  | 0.0   | 0.0  |
| 1   | sublitoral   | eastern | spring | 2015 | 0.0    | 0.0  | 0.0 | 0.0 | 0.0  | 0.0 | 0.0  | 0.0 | 0.0 | 0.0   | 0.0   | 0.0  | 0.0   | 0.0   | 0.0  | 0.0   | 0.0   | 0.0  | 0.0 | 0.0 | 0.0  | 0.0 | 0.0 | 0.0  | 0.0   | 0.0  |
| 1   | sublitoral   | eastern | summer | 2015 | 88.9   | 0.0  | 0.0 | 0.0 | 0.0  | 0.0 | 0.0  | 0.0 | 0.0 | 637.0 | 59.3  | 0.0  | 14.8  | 0.0   | 0.0  | 0.0   | 0.0   | 0.0  | 0.0 | 0.0 | 14.8 | 0.0 | 0.0 | 0.0  | 133.3 | 0.0  |
| 1   | sublitoral   | eastern | autumn | 2015 | 59.3   | 0.0  | 0.0 | 0.0 | 0.0  | 0.0 | 0.0  | 0.0 | 0.0 | 0.0   | 0.0   | 0.0  | 0.0   | 385.2 | 0.0  | 0.0   | 0.0   | 0.0  | 0.0 | 0.0 | 0.0  | 0.0 | 0.0 | 0.0  | 0.0   | 0.0  |
| 3   | sublitoral   | eastern | spring | 2014 | 0.0    | 0.0  | 0.0 | 0.0 | 0.0  | 0.0 | 0.0  | 0.0 | 0.0 | 0.0   | 0.0   | 14.8 | 14.8  | 0.0   | 0.0  | 0.0   | 0.0   | 44.4 | 0.0 | 0.0 | 0.0  | 0.0 | 0.0 | 0.0  | 0.0   | 0.0  |
| 3   | sublitoral   | eastern | summer | 2014 | 29.6   | 0.0  | 0.0 | 0.0 | 0.0  | 0.0 | 0.0  | 0.0 | 0.0 | 44.4  | 0.0   | 0.0  | 44.4  | 0.0   | 0.0  | 0.0   | 0.0   | 0.0  | 0.0 | 0.0 | 0.0  | 0.0 | 0.0 | 0.0  | 0.0   | 0.0  |
| 3   | sublitoral   | eastern | autumn | 2014 | 88.9   | 0.0  | 0.0 | 0.0 | 0.0  | 0.0 | 0.0  | 0.0 | 0.0 | 14.8  | 0.0   | 0.0  | 651.9 | 533.3 | 0.0  | 0.0   | 0.0   | 0.0  | 0.0 | 0.0 | 0.0  | 0.0 | 0.0 | 0.0  | 0.0   | 0.0  |
| 3   | sublitoral   | eastern | spring | 2015 | 44.4   | 0.0  | 0.0 | 0.0 | 0.0  | 0.0 | 0.0  | 0.0 | 0.0 | 59.3  | 0.0   | 0.0  | 29.6  | 0.0   | 0.0  | 0.0   | 177.8 | 29.6 | 0.0 | 0.0 | 0.0  | 0.0 | 0.0 | 0.0  | 0.0   | 0.0  |
| 3   | sublitoral   | eastern | summer | 2015 | 148.1  | 0.0  | 0.0 | 0.0 | 0.0  | 0.0 | 0.0  | 0.0 | 0.0 | 29.6  | 0.0   | 0.0  | 0.0   | 0.0   | 0.0  | 355.6 | 0.0   | 14.8 | 0.0 | 0.0 | 0.0  | 0.0 | 0.0 | 0.0  | 0.0   | 0.0  |
| 3   | sublitoral   | eastern | autumn | 2015 | 59.3   | 0.0  | 0.0 | 0.0 | 0.0  | 0.0 | 0.0  | 0.0 | 0.0 | 0.0   | 0.0   | 0.0  | 0.0   | 0.0   | 0.0  | 266.7 | 0.0   | 0.0  | 0.0 | 0.0 | 0.0  | 0.0 | 0.0 | 0.0  | 0.0   | 0.0  |
| 5   | sublitoral   | eastern | spring | 2014 | 163.0  | 0.0  | 0.0 | 0.0 | 0.0  | 0.0 | 0.0  | 0.0 | 0.0 | 88.9  | 0.0   | 0.0  | 14.8  | 0.0   | 0.0  | 14.8  | 0.0   | 29.6 | 0.0 | 0.0 | 0.0  | 0.0 | 0.0 | 0.0  | 0.0   | 0.0  |
| 5   | sublitoral   | eastern | summer | 2014 | 14.8   | 0.0  | 0.0 | 0.0 | 0.0  | 0.0 | 0.0  | 0.0 | 0.0 | 118.5 | 0.0   | 0.0  | 0.0   | 0.0   | 0.0  | 0.0   | 0.0   | 0.0  | 0.0 | 0.0 | 0.0  | 0.0 | 0.0 | 0.0  | 0.0   | 0.0  |
| 5   | sublitoral   | eastern | autumn | 2014 | 29.6   | 0.0  | 0.0 | 0.0 | 0.0  | 0.0 | 0.0  | 0.0 | 0.0 | 0.0   | 0.0   | 0.0  | 0.0   | 44.4  | 0.0  | 0.0   | 0.0   | 0.0  | 0.0 | 0.0 | 0.0  | 0.0 | 0.0 | 0.0  | 0.0   | 29.6 |
| 5   | sublitoral   | eastern | spring | 2015 | 74.1   | 0.0  | 0.0 | 0.0 | 0.0  | 0.0 | 0.0  | 0.0 | 0.0 | 0.0   | 0.0   | 0.0  | 14.8  | 0.0   | 0.0  | 0.0   | 14.8  | 29.6 | 0.0 | 0.0 | 0.0  | 0.0 | 0.0 | 0.0  | 0.0   | 0.0  |
| 5   | sublitoral   | eastern | summer | 2015 | 29.6   | 0.0  | 0.0 | 0.0 | 0.0  | 0.0 | 0.0  | 0.0 | 0.0 | 118.5 | 0.0   | 0.0  | 0.0   | 0.0   | 0.0  | 0.0   | 0.0   | 0.0  | 0.0 | 0.0 | 0.0  | 0.0 | 0.0 | 0.0  | 0.0   | 0.0  |
| 5   | sublitoral   | eastern | autumn | 2015 | 14.8   | 0.0  | 0.0 | 0.0 | 0.0  | 0.0 | 0.0  | 0.0 | 0.0 | 0.0   | 0.0   | 0.0  | 74.1  | 44.4  | 0.0  | 0.0   | 0.0   | 0.0  | 0.0 | 0.0 | 0.0  | 0.0 | 0.0 | 0.0  | 0.0   | 0.0  |

Table S3. Correlation coefficients (r, after Bonferroni correction) between benthic invertebrates taxa and depth in segments of Lake Wicko.

| Taxa                              | all sites     | western segment | eastern segment |
|-----------------------------------|---------------|-----------------|-----------------|
| <i>Polypedilum scalaeum</i>       | <b>0.416</b>  | 0.000           | <b>0.434</b>    |
| <i>Polypedilum nubculosum</i>     | 0.232         | -0.114          | 0.222           |
| <i>Tanatyus mancus</i>            | 0.185         | 0.108           | 0.175           |
| <i>Chironomus</i> sp.             | 0.134         | <b>0.385</b>    | -0.098          |
| <i>Theodoxus fluviatilis</i>      | 0.111         | <b>0.358</b>    | -0.253          |
| <i>Cryptochironomus conjugens</i> | 0.086         | <b>0.345</b>    | -0.239          |
| <i>Unio pictorum</i>              | 0.046         | -0.190          | 0.237           |
| <i>Tanytarsus gregarius</i>       | 0.039         | -0.114          | 0.019           |
| <i>Procladius</i> spp.            | 0.038         | <b>0.410</b>    | -0.057          |
| <i>Ptychoptera</i> spp.           | 0.034         | <b>0.396</b>    | -0.058          |
| Oligochaeta                       | 0.008         | 0.059           | -0.039          |
| <i>Sphaerium corneus</i>          | -0.063        | -0.152          | -0.103          |
| <i>Einfeldia carbonaria</i>       | -0.065        | -0.152          | -0.124          |
| <i>Bezzia</i> sp.                 | -0.085        | -0.161          | -0.083          |
| <i>Helobdella stagnalis</i>       | -0.126        | -0.076          | -0.182          |
| <i>Phryganea grandis</i>          | -0.158        | -0.137          | -0.179          |
| <i>Sialis lutaria</i>             | -0.182        | -0.101          | -0.249          |
| <i>Planorbis planorbis</i>        | -0.189        | -0.163          | -0.227          |
| <i>Erpobdella octoculata</i>      | -0.190        | -0.188          | -0.237          |
| <i>Planorbarius corneus</i>       | -0.195        | -0.180          | -0.232          |
| <i>Glossiphonia complanata</i>    | -0.215        | -0.114          | <b>-0.365</b>   |
| <i>Ecnomus tenellus</i>           | -0.225        | -0.229          | -0.262          |
| <i>Valvata piscinalis</i>         | -0.226        | -0.143          | <b>-0.317</b>   |
| <i>Limnophilus politus</i>        | <b>-0.320</b> | -0.232          | <b>-0.468</b>   |
| <i>Asellus aquaticus</i>          | <b>-0.361</b> | -0.249          | <b>-0.530</b>   |
| Chironomidae n.det.               | <b>-0.387</b> | <b>-0.473</b>   | <b>-0.393</b>   |

Table S4. Bioassessment indices based on the structure of benthic invertebrates for two segments of Lake Wicko.

| Depth | Zones        | Segment | Month  | Year | Total  | H'    | J'    | RICHtot | BMWP | ASPT | CHIR_t | EPT | MOLCRU_t | total EPT | oligochaeta/<br>chironomidae | OOC  | Gr/Sc | FF    | GaCol  | Shr  | Pred | other |
|-------|--------------|---------|--------|------|--------|-------|-------|---------|------|------|--------|-----|----------|-----------|------------------------------|------|-------|-------|--------|------|------|-------|
| 0.3   | eulitoral    | western | spring | 2014 | 12.6   | 1.445 | 0.848 | 5       | 23   | 5.8  | 1      | 2   | 1.9      | 3.1       | 4.7                          | 0.00 | 0.5   | 4.8   | 0.0    | 0.0  | 2.6  | 4.7   |
| 0.3   | eulitoral    | western | summer | 2014 | 254.3  | 0.835 | 0.384 | 6       | 20   | 6.7  | 2      | 1   | 3.4      | 2.9       | 154.6                        | 0.00 | 2.9   | 93.4  | 0.0    | 5.7  | 0.0  | 152.3 |
| 0.3   | eulitoral    | western | autumn | 2014 | 222.2  | 0.974 | 0.441 | 6       | 18   | 3.6  | 1      | 1   | 12.6     | 35.3      | 168.7                        | 0.07 | 35.3  | 0.0   | 11.2   | 13.8 | 5.6  | 156.3 |
| 0.3   | eulitoral    | western | spring | 2015 | 198.3  | 1.264 | 0.708 | 5       | 24   | 4.8  | 1      | 0   | 31.2     | 0.0       | 138.5                        | 0.23 | 0.0   | 44.2  | 25.6   | 15.6 | 0.0  | 112.9 |
| 0.3   | eulitoral    | western | summer | 2015 | 359.3  | 0.425 | 0.306 | 5       | 20   | 4.0  | 1      | 2   | 11.9     | 25.4      | 322.0                        | 0.00 | 0.8   | 11.9  | 0.0    | 0.0  | 24.6 | 322.0 |
| 0.3   | eulitoral    | western | autumn | 2015 | 202.3  | 1.403 | 0.678 | 6       | 15   | 3.8  | 1      | 1   | 10.3     | 50.3      | 106.1                        | 0.16 | 0.0   | 35.6  | 14.6   | 12.5 | 50.3 | 89.3  |
| 0.5   | infralitoral | western | spring | 2014 | 108.2  | 0.746 | 0.703 | 3       | 6    | 3.0  | 1      | 0   | 0.0      | 0.0       | 107.0                        | 0.00 | 0.0   | 0.0   | 0.0    | 52.1 | 1.2  | 54.9  |
| 0.5   | infralitoral | western | summer | 2014 | 152.7  | 1.156 | 0.529 | 6       | 19   | 4.8  | 2      | 3   | 4.4      | 2.6       | 145.7                        | 0.21 | 0.0   | 0.0   | 61.4   | 4.4  | 2.6  | 84.3  |
| 0.5   | infralitoral | western | autumn | 2014 | 196.7  | 0.491 | 0.327 | 5       | 26   | 5.2  | 1      | 3   | 2.3      | 8.8       | 174.3                        | 0.00 | 5.9   | 2.3   | 174.3  | 0.0  | 14.2 | 0.0   |
| 0.5   | infralitoral | western | spring | 2015 | 144.4  | 1.632 | 0.639 | 8       | 22   | 3.7  | 2      | 0   | 29.5     | 11.3      | 68.0                         | 0.20 | 11.3  | 37.9  | 13.6   | 27.2 | 0.0  | 54.4  |
| 0.5   | infralitoral | western | summer | 2015 | 183.0  | 1.426 | 0.594 | 7       | 30   | 10.0 | 3      | 3   | 5.9      | 0.0       | 136.5                        | 0.00 | 0.0   | 41.9  | 26.3   | 22.3 | 1.3  | 91.2  |
| 0.5   | infralitoral | western | autumn | 2015 | 177.3  | 1.057 | 0.576 | 5       | 21   | 5.3  | 1      | 0   | 12.5     | 11.3      | 153.5                        | 0.41 | 11.3  | 5.6   | 44.6   | 6.9  | 0.0  | 108.9 |
| 0.7   | infralitoral | western | spring | 2014 | 21.0   | 0.994 | 0.676 | 4       | 15   | 3.8  | 1      | 1   | 2.3      | 2.3       | 16.4                         | 0.16 | 0.0   | 0.0   | 2.3    | 2.3  | 2.3  | 14.1  |
| 0.7   | infralitoral | western | summer | 2014 | 56.3   | 1.112 | 0.608 | 5       | 19   | 4.8  | 1      | 1   | 3.6      | 2.3       | 48.1                         | 0.49 | 2.3   | 2.3   | 15.8   | 3.6  | 0.0  | 32.3  |
| 0.7   | infralitoral | western | autumn | 2014 | 88.9   | 1.114 | 0.508 | 6       | 11   | 2.2  | 2      | 0   | 8.5      | 0.0       | 78.1                         | 0.08 | 0.0   | 8.5   | 21.8   | 0.0  | 2.3  | 56.3  |
| 0.7   | infralitoral | western | spring | 2015 | 125.3  | 1.003 | 0.454 | 6       | 23   | 3.8  | 1      | 0   | 16.8     | 0.0       | 101.6                        | 0.14 | 0.0   | 5.8   | 12.3   | 12.3 | 5.6  | 89.3  |
| 0.7   | infralitoral | western | summer | 2015 | 99.3   | 0.319 | 0.344 | 4       | 10   | 2.5  | 1      | 1   | 0.0      | 0.3       | 93.1                         | 0.02 | 0.3   | 5.9   | 1.4    | 0.0  | 0.0  | 91.7  |
| 0.7   | infralitoral | western | autumn | 2015 | 102.3  | 1.039 | 0.566 | 5       | 12   | 3.0  | 2      | 2   | 0.0      | 17.3      | 85.0                         | 0.17 | 17.3  | 0.0   | 15.8   | 0.0  | 0.0  | 69.2  |
| 1     | sublitoral   | western | spring | 2014 | 296.4  | 0.888 | 0.608 | 2       | 5    | 2.5  | 2      | 0   | 0        | 0.0       | 296.4                        | 2.64 | 0.0   | 29.7  | 266.7  | 0.0  | 0.0  | 0.0   |
| 1     | sublitoral   | western | summer | 2014 | 162.9  | 1.023 | 0.696 | 3       | 9    | 3.0  | 1      | 0   | 0        | 0.0       | 155.5                        | 0.40 | 0.0   | 96.3  | 59.2   | 7.4  | 0.0  | 0.0   |
| 1     | sublitoral   | western | autumn | 2014 | 370.4  | 1.082 | 0.590 | 3       | 12   | 4.0  | 2      | 0   | 0        | 0.0       | 340.7                        | 0.05 | 0.0   | 133.4 | 237.0  | 0.0  | 0.0  | 0.0   |
| 1     | sublitoral   | western | spring | 2015 | 88.9   | 0.287 | 0.666 | 2       | 5    | 2.5  | 0      | 0   | 0        | 0.0       | 88.9                         | 0.09 | 0.0   | 81.5  | 7.4    | 0.0  | 0.0  | 0.0   |
| 1     | sublitoral   | western | summer | 2015 | 370.4  | 1.172 | 0.807 | 2       | 5    | 2.5  | 2      | 0   | 0        | 0.0       | 370.4                        | 0.43 | 0.0   | 133.4 | 237.0  | 0.0  | 0.0  | 0.0   |
| 1     | sublitoral   | western | autumn | 2015 | 392.6  | 0.376 | 0.485 | 2       | 5    | 2.5  | 2      | 0   | 0        | 0.0       | 392.6                        | 0.06 | 0.0   | 0.0   | 392.6  | 0.0  | 0.0  | 0.0   |
| 3     | sublitoral   | western | spring | 2014 | 163.0  | 0.689 | 0.996 | 2       | 5    | 2.5  | 0      | 0   | 0        | 0.0       | 163.0                        | 0.83 | 0.0   | 88.9  | 74.1   | 0.0  | 0.0  | 0.0   |
| 3     | sublitoral   | western | summer | 2014 | 88.9   | 0.450 | 0.784 | 1       | 3    | 3.0  | 1      | 0   | 0        | 0.0       | 88.9                         | 0.00 | 0.0   | 74.1  | 14.8   | 0.0  | 0.0  | 0.0   |
| 3     | sublitoral   | western | autumn | 2014 | 8770.4 | 0.154 | 0.389 | 2       | 5    | 2.5  | 2      | 0   | 0        | 0.0       | 8770.4                       | 0.00 | 0.0   | 0.0   | 8770.4 | 0.0  | 0.0  | 0.0   |



|     |              |         |        |      |        |       |       |    |    |     |   |   |       |      |        |      |      |       |        |       |      |       |
|-----|--------------|---------|--------|------|--------|-------|-------|----|----|-----|---|---|-------|------|--------|------|------|-------|--------|-------|------|-------|
| 3   | sublitoral   | western | spring | 2015 | 0.0    | 0.000 | 0.000 | 0  | 0  | 0.0 | 0 | 0 | 0     | 0.0  | 0.0    | 0.00 | 0.0  | 0.0   | 0.0    | 0.0   | 0.0  | 0.0   |
| 3   | sublitoral   | western | summer | 2015 | 444.4  | 0.980 | 0.666 | 2  | 5  | 2.5 | 2 | 0 | 0     | 0.0  | 444.4  | 0.07 | 0.0  | 74.1  | 325.9  | 0.0   | 0.0  | 44.4  |
| 3   | sublitoral   | western | autumn | 2015 | 651.8  | 1.022 | 0.927 | 2  | 9  | 4.5 | 1 | 0 | 0     | 0.0  | 503.7  | 0.00 | 0.0  | 163.0 | 340.7  | 148.1 | 0.0  | 0.0   |
| 0.3 | eulitoral    | eastern | spring | 2014 | 105.7  | 1.742 | 0.519 | 11 | 34 | 3.4 | 3 | 2 | 14.5  | 3.6  | 83.8   | 0.32 | 1.3  | 2.3   | 32.6   | 19.8  | 6.1  | 43.6  |
| 0.3 | eulitoral    | eastern | summer | 2014 | 122.3  | 0.975 | 0.265 | 10 | 36 | 3.6 | 1 | 2 | 18.8  | 7.3  | 92.8   | 0.00 | 5.6  | 1.3   | 0.0    | 18.8  | 5.1  | 91.5  |
| 0.3 | eulitoral    | eastern | autumn | 2014 | 108.6  | 2.167 | 0.873 | 11 | 33 | 4.0 | 3 | 2 | 30.3  | 17.9 | 56.8   | 0.28 | 12.3 | 12.5  | 14.6   | 45.1  | 9.2  | 14.9  |
| 0.3 | eulitoral    | eastern | spring | 2015 | 187.3  | 2.076 | 0.725 | 10 | 39 | 3.6 | 2 | 2 | 26.3  | 12.6 | 130.5  | 0.12 | 10.3 | 27.5  | 26.6   | 40.3  | 20.2 | 62.4  |
| 0.3 | eulitoral    | eastern | summer | 2015 | 221.0  | 1.600 | 0.495 | 11 | 38 | 3.6 | 2 | 1 | 19.9  | 6.4  | 176.6  | 0.13 | 6.4  | 68.7  | 20.5   | 18.4  | 18.1 | 88.9  |
| 0.3 | eulitoral    | eastern | autumn | 2015 | 165.3  | 1.908 | 0.749 | 9  | 40 | 4.2 | 1 | 1 | 82.7  | 11.9 | 70.7   | 0.22 | 11.9 | 15.5  | 57.8   | 80.1  | 0.0  | 0.0   |
| 0.5 | infralitoral | eastern | spring | 2014 | 87.2   | 1.962 | 0.647 | 11 | 39 | 3.9 | 2 | 2 | 38.4  | 12.0 | 21.8   | 0.00 | 12.0 | 1.9   | 0.0    | 56.2  | 15.0 | 2.1   |
| 0.5 | infralitoral | eastern | summer | 2014 | 235.3  | 1.319 | 0.340 | 8  | 33 | 2.8 | 1 | 2 | 28.1  | 5.4  | 194.7  | 0.02 | 5.4  | 99.3  | 95.4   | 28.1  | 7.1  | 0.0   |
| 0.5 | infralitoral | eastern | autumn | 2014 | 452.3  | 0.943 | 0.321 | 8  | 34 | 2.9 | 1 | 3 | 38.1  | 66.0 | 348.2  | 0.00 | 43.7 | 2.3   | 0.0    | 35.8  | 22.3 | 348.2 |
| 0.5 | infralitoral | eastern | spring | 2015 | 326.9  | 1.036 | 0.403 | 7  | 38 | 4.0 | 1 | 2 | 88.1  | 16.1 | 222.7  | 0.00 | 11.8 | 16.9  | 0.0    | 71.2  | 4.3  | 222.7 |
| 0.5 | infralitoral | eastern | summer | 2015 | 226.3  | 0.565 | 0.251 | 6  | 34 | 2.5 | 1 | 2 | 18.1  | 5.6  | 198.3  | 0.00 | 2.6  | 0.0   | 0.0    | 18.1  | 7.3  | 198.3 |
| 0.5 | infralitoral | eastern | autumn | 2015 | 541.3  | 0.551 | 0.193 | 9  | 33 | 4.0 | 3 | 2 | 31.7  | 15.2 | 492.1  | 0.01 | 2.9  | 0.0   | 3.8    | 31.7  | 14.6 | 488.3 |
| 0.7 | infralitoral | eastern | spring | 2014 | 105.3  | 1.446 | 0.424 | 10 | 36 | 4.0 | 1 | 2 | 30.2  | 12.3 | 57.7   | 0.04 | 5.8  | 5.0   | 2.2    | 25.6  | 11.6 | 55.1  |
| 0.7 | infralitoral | eastern | summer | 2014 | 369.9  | 0.578 | 0.198 | 9  | 24 | 2.6 | 2 | 3 | 0.3   | 27.6 | 341.5  | 0.01 | 3.0  | 2.6   | 18.7   | 0.3   | 25.1 | 320.2 |
| 0.7 | infralitoral | eastern | autumn | 2014 | 399.3  | 1.233 | 0.429 | 8  | 26 | 2.5 | 1 | 1 | 60.9  | 5.6  | 328.4  | 0.01 | 0.0  | 112.8 | 215.6  | 60.9  | 10.0 | 0.0   |
| 0.7 | infralitoral | eastern | spring | 2015 | 687.3  | 1.571 | 0.481 | 10 | 30 | 3.1 | 2 | 2 | 32.3  | 64.1 | 587.3  | 0.02 | 9.2  | 141.1 | 201.9  | 27.7  | 58.5 | 248.9 |
| 0.7 | infralitoral | eastern | summer | 2015 | 532.9  | 1.397 | 0.449 | 9  | 21 | 4.7 | 3 | 1 | 36.1  | 0.2  | 493.5  | 0.02 | 0.2  | 65.3  | 308.2  | 36.1  | 3.1  | 120.0 |
| 0.7 | infralitoral | eastern | autumn | 2015 | 841.3  | 0.488 | 0.407 | 5  | 18 | 3.3 | 1 | 0 | 12.4  | 0.0  | 816.6  | 0.12 | 0.0  | 12.4  | 816.6  | 0.0   | 12.3 | 0.0   |
| 1   | sublitoral   | eastern | spring | 2014 | 1777.7 | 0.440 | 0.517 | 3  | 9  | 3.0 | 0 | 0 | 0.0   | 0.0  | 1777.7 | 6.06 | 0.0  | 237.0 | 1525.9 | 14.8  | 0.0  | 0.0   |
| 1   | sublitoral   | eastern | summer | 2014 | 1748.1 | 0.951 | 0.647 | 3  | 9  | 3.0 | 1 | 0 | 0.0   | 0.0  | 1748.1 | 1.19 | 0.0  | 651.9 | 1066.6 | 29.6  | 0.0  | 0.0   |
| 1   | sublitoral   | eastern | autumn | 2014 | 133.4  | 0.687 | 0.994 | 2  | 7  | 3.5 | 1 | 0 | 0.0   | 0.0  | 133.4  | 0.00 | 0.0  | 0.0   | 59.3   | 74.1  | 0.0  | 0.0   |
| 1   | sublitoral   | eastern | spring | 2015 | 0.0    | 0.000 | 0.000 | 0  | 0  | 0.0 | 0 | 0 | 0.0   | 0.0  | 0.0    | 0.00 | 0.0  | 0.0   | 0.0    | 0.0   | 0.0  | 0.0   |
| 1   | sublitoral   | eastern | summer | 2015 | 948.1  | 1.068 | 0.485 | 4  | 13 | 3.3 | 2 | 0 | 148.1 | 0.0  | 800.0  | 0.13 | 0.0  | 770.3 | 103.7  | 14.8  | 0.0  | 59.3  |
| 1   | sublitoral   | eastern | autumn | 2015 | 444.5  | 0.393 | 0.741 | 2  | 5  | 2.5 | 1 | 0 | 0.0   | 0.0  | 444.5  | 0.15 | 0.0  | 0.0   | 444.5  | 0.0   | 0.0  | 0.0   |
| 3   | sublitoral   | eastern | spring | 2014 | 74.0   | 0.950 | 0.862 | 1  | 3  | 3.0 | 2 | 0 | 0.0   | 0    | 74.0   | 0.00 | 0.0  | 0.0   | 14.8   | 59.2  | 0.0  | 0.0   |
| 3   | sublitoral   | eastern | summer | 2014 | 118.4  | 1.082 | 0.984 | 2  | 5  | 2.5 | 1 | 0 | 0.0   | 0    | 118.4  | 0.33 | 0.0  | 44.4  | 74.0   | 0.0   | 0.0  | 0.0   |
| 3   | sublitoral   | eastern | autumn | 2014 | 1288.9 | 0.946 | 0.644 | 2  | 5  | 2.5 | 2 | 0 | 0.0   | 0    | 1288.9 | 0.07 | 0.0  | 14.8  | 1274.1 | 0.0   | 0.0  | 0.0   |

|   |            |         |        |      |       |       |       |   |    |     |   |   |      |   |       |      |     |       |       |      |     |      |
|---|------------|---------|--------|------|-------|-------|-------|---|----|-----|---|---|------|---|-------|------|-----|-------|-------|------|-----|------|
| 3 | sublitoral | eastern | spring | 2015 | 340.7 | 1.334 | 0.759 | 2 | 5  | 2.5 | 2 | 0 | 0.0  | 0 | 340.7 | 0.15 | 0.0 | 59.3  | 251.8 | 29.6 | 0.0 | 0.0  |
| 3 | sublitoral | eastern | summer | 2015 | 548.1 | 0.889 | 0.608 | 2 | 5  | 2.5 | 2 | 0 | 0.0  | 0 | 548.1 | 0.37 | 0.0 | 29.6  | 503.7 | 0.0  | 0.0 | 14.8 |
| 3 | sublitoral | eastern | autumn | 2015 | 326.0 | 0.474 | 0.803 | 2 | 5  | 2.5 | 1 | 0 | 0.0  | 0 | 326.0 | 0.22 | 0.0 | 0.0   | 326.0 | 0.0  | 0.0 | 0.0  |
| 5 | sublitoral | eastern | spring | 2014 | 311.1 | 1.210 | 0.671 | 3 | 9  | 3.0 | 1 | 0 | 0.0  | 0 | 311.1 | 1.10 | 0.0 | 88.9  | 177.8 | 44.4 | 0.0 | 0.0  |
| 5 | sublitoral | eastern | summer | 2014 | 133.3 | 0.349 | 0.709 | 2 | 5  | 2.5 | 0 | 0 | 0.0  | 0 | 133.3 | 0.12 | 0.0 | 118.5 | 14.8  | 0.0  | 0.0 | 0.0  |
| 5 | sublitoral | eastern | autumn | 2014 | 103.6 | 1.079 | 0.981 | 3 | 12 | 4.0 | 1 | 0 | 29.6 | 0 | 74.0  | 0.67 | 0.0 | 29.6  | 74.0  | 0.0  | 0.0 | 0.0  |
| 5 | sublitoral | eastern | spring | 2015 | 133.3 | 1.149 | 0.789 | 2 | 5  | 2.5 | 2 | 0 | 0.0  | 0 | 133.3 | 1.25 | 0.0 | 0.0   | 103.7 | 29.6 | 0.0 | 0.0  |
| 5 | sublitoral | eastern | summer | 2015 | 148.1 | 0.500 | 0.825 | 2 | 5  | 2.5 | 0 | 0 | 0.0  | 0 | 148.1 | 0.25 | 0.0 | 118.5 | 29.6  | 0.0  | 0.0 | 0.0  |
| 5 | sublitoral | eastern | autumn | 2015 | 133.3 | 0.937 | 0.851 | 2 | 5  | 2.5 | 2 | 0 | 0.0  | 0 | 133.3 | 0.12 | 0.0 | 0.0   | 133.3 | 0.0  | 0.0 | 0.0  |
